# Supplementary material for: Serum biomarkers confirming stable remission in inflammatory bowel disease
Source: PubMed Central journal article supplement (PMC7988138; doi:10.1038/s41598-021-86251-w), 2021-03-23
Supplement: 41598_2021_86251_MOESM1_ESM.pdf [file 41598_2021_86251_MOESM1_ESM.pdf]

## Supplementary Material

### **Serum biomarkers confirming stable remission in inflammatory bowel disease**

Christoph Kessel, PhD<sup>1,\*</sup>, Miha Lavric, PhD<sup>1,2,\*</sup>, Toni Weinhage, PhD<sup>1</sup>, Markus Brueckner, MD<sup>3</sup>, Sytze de Roock, MD<sup>4</sup>, Jan Däbritz, MD<sup>5</sup>, Jakob Weber, PhD<sup>6</sup>, Sebastiaan J. Vastert, MD<sup>4</sup>, Dirk Foell, MD<sup>1</sup>

*<sup>1</sup>Pediatric Rheumatology and Immunology, University Hospital Muenster, Germany; <sup>2</sup>Research Group Ambient Intelligence, Saxion University of Applied Sciences, Enschede, Netherlands; <sup>3</sup>Department of Gastroenterology and Hepatology, University Hospital Muenster, Germany; <sup>4</sup>Department of Pediatric Rheumatology and Immunology and Center for Translational Immunology, University Medical Center Utrecht, Netherlands; <sup>5</sup>Department of Pediatrics, University Medical Center Rostock, Germany; <sup>6</sup>BÜHLMANN Laboratories AG, Schoenenbuch, Switzerland; \*authors contributed equally*

**SUPPLEMENTARY TABLE S1. Comparison of fecal biomarkers (in mg/kg)**

| Marker                        | IBD (n=40)                         |                                      |                       | P <sup>a</sup> | UC (n=30)                          |                                      |                      | P <sup>a</sup> |
|-------------------------------|------------------------------------|--------------------------------------|-----------------------|----------------|------------------------------------|--------------------------------------|----------------------|----------------|
|                               | Stable Remission<br>Median (95%CI) | Unstable Remission<br>Median (95%CI) | AUC<br>(95%CI)        |                | Stable Remission<br>Median (95%CI) | Unstable Remission<br>Median (95%CI) | AUC<br>(95%CI)       |                |
| <b>fecal<br/>S100A12</b>      | 0.90<br>(0.09-15.50)               | 1.20<br>(0.04-11.70)                 | 0.558<br>(0.36-0.75)  | 0.567          | 0.86<br>(0.09-4.15)                | 1.25<br>(0.11-11.70)                 | 0.661<br>(0.45-0.87) | 0.169          |
| <b>Fecal<br/>Calprotectin</b> | 30.4<br>(1.3-365.5)                | 62.1<br>(13.2-350.0)                 | 0.674<br>(0.49- 0.86) | 0.089          | 25.9<br>(13.2-128.5)               | 54.5<br>(1.5-365.5)                  | 0.591<br>(0.38-0.80) | 0.395          |

CI, confidence interval; AUC, area under curve; <sup>a</sup> significance of ROC analyses

**SUPPLEMENTARY TABLE S2. Performance of significant serum biomarkers in UC (T2<60 days, n=27) with significant differences at T1**

| UC (with T2 in < 60 days, n=27) |                                    |                                      |                      |                |                     |
|---------------------------------|------------------------------------|--------------------------------------|----------------------|----------------|---------------------|
| Marker                          | Stable Remission<br>Median (95%CI) | Unstable Remission<br>Median (95%CI) | AUC<br>(95%CI)       | P <sup>a</sup> | P adj. <sup>b</sup> |
| <b>IL-1<math>\beta</math></b>   | 1.38<br>(0.4-2.25)                 | 3.62<br>(1.03-8.63)                  | 0.761<br>(0.58-0.94) | <b>0.022</b>   | <i>n.s.</i>         |
| <b>IL-8</b>                     | 15.62<br>(12.51-43.53)             | 28.06<br>(20.60-68.36)               | 0.739<br>(0.54-0.94) | <b>0.036</b>   | <i>n.s.</i>         |
| <b>IL-15</b>                    | 3.99<br>(2.99-5.63)                | 8.17<br>(4.91-9.40)                  | 0.800<br>(0.63-0.97) | <b>0.008</b>   | <b>0.045</b>        |
| <b>IL-21</b>                    | 925<br>(10-2857)                   | 2182<br>(1326-6266)                  | 0.767<br>(0.59-0.95) | <b>0.019</b>   | <i>n.s.</i>         |
| <b>IL-25</b>                    | 962<br>(28.28-1683)                | 2847<br>(617-8210)                   | 0.789<br>(0.62-0.96) | <b>0.011</b>   | <i>n.s.</i>         |
| <b>IFN<math>\beta</math></b>    | 73.41<br>(10-1260)                 | 2501<br>(10-4492)                    | 0.756<br>(0.57-0.94) | <b>0.025</b>   | <i>n.s.</i>         |
| <b>CXCL9</b>                    | 26.32<br>(13.51-42.15)             | 62.97<br>(35.6-116.5)                | 0.794<br>(0.61-0.97) | <b>0.009</b>   | <b>0.040</b>        |
| <b>CXCL10</b>                   | 212<br>(124-277)                   | 322<br>(238-597)                     | 0.783<br>(0.61-0.96) | <b>0.013</b>   | <b>0.017</b>        |
| <b>CXCL11</b>                   | 26.6<br>(12.05-84.27)              | 151<br>(46.53-192)                   | 0.822<br>(0.66-0.99) | <b>0.005</b>   | <b>0.007</b>        |
| <b>G-CSF</b>                    | 15.99<br>(9.6-27.00)               | 61.4<br>(20.1-194)                   | 0.756<br>(0.56-0.95) | <b>0.025</b>   | <i>n.s.</i>         |
| <b>S100A8/A9</b>                | 2215<br>(1480-3300)                | 3920<br>(3270-6100)                  | 0.822<br>(0.64-1.00) | <b>0.005</b>   | <b>0.017</b>        |

All in pg/ml, except for S100A8/A9 (ng/ml) and IFN $\beta$  (U/ml); CI, confidence interval; AUC, area under curve; <sup>a</sup>significance of ROC analyses; <sup>b</sup>adjusted significance using Kruskal Wallis test with Bonferroni post-hoc correction for multiple comparisons

**SUPPLEMENTARY TABLE S3. IBD relapse prediction model according to binary logistic regression**

| Step 0           |              |              | Step 1                      |              |                              |
|------------------|--------------|--------------|-----------------------------|--------------|------------------------------|
| Variable         | Score        | P            | Change in -2 Log Likelihood | P            | Model correct prediction (%) |
| <b>S100A8/A9</b> | <b>5.548</b> | <b>0.019</b> | <b>5.883</b>                | <b>0.015</b> | <b>70</b>                    |
| CXCL9            | 5.312        | 0.021        | 2.898                       | 0.089        |                              |
| CXCL10           | 4.011        | 0.045        | 2.774                       | 0.096        |                              |
| CXCL11           | 2.720        | 0.099        | 2.718                       | 0.099        |                              |
| IL-21            | 2.064        | 0.151        | 2.207                       | 0.137        |                              |
| Galectin-1       | 1.630        | 0.202        | 0.300                       | 0.584        |                              |

**SUPPLEMENTARY TABLE S4. UC relapse prediction model according to binary logistic regression**

| Step 0           |              |              | Step 1                      |              |                              | Step 2                      |              |                              |
|------------------|--------------|--------------|-----------------------------|--------------|------------------------------|-----------------------------|--------------|------------------------------|
| Variable         | Score        | P            | Change in -2 Log Likelihood | P            | Model correct prediction (%) | Change in -2 Log Likelihood | P            | Model correct prediction (%) |
| <b>CXCL11</b>    | <b>8.373</b> | <b>0.004</b> | <b>9.563</b>                | <b>0.002</b> | <b>67</b>                    | <b>5.956</b>                | <b>0.015</b> | <b>80</b>                    |
| <b>S100A8/A9</b> | <b>8.061</b> | <b>0.005</b> | <b>5.211</b>                | <b>0.022</b> | <b>-</b>                     | <b>5.509</b>                | <b>0.019</b> | <b>80</b>                    |
| CXCL9            | 5.908        | 0.015        | 1.570                       | 0.210        |                              | 0.155                       | 0.693        |                              |
| IL-21            | 5.638        | 0.018        | 2.048                       | 0.152        |                              | 1.483                       | 0.223        |                              |
| CXCL10           | 5.166        | 0.023        | 2.050                       | 0.152        |                              | 3.121                       | 0.077        |                              |
| Galectin-1       | 2.830        | 0.093        | 2.071                       | 0.150        |                              | 2.072                       | 0.150        |                              |

**SUPPLEMENTARY TABLE S5. Performance of markers with predictive potential**

| Marker           | IBD (n=40)           |            |             |             |     | UC (n=30)            |            |             |             |     |
|------------------|----------------------|------------|-------------|-------------|-----|----------------------|------------|-------------|-------------|-----|
|                  | AUC<br>(95%CI)       | Cut-Off    | Sensitivity | Specificity | LR  | AUC<br>(95%CI)       | Cut-Off    | Sensitivity | Specificity | LR  |
| <b>CXCL11</b>    | 0.700<br>(0.53-0.87) | 131 pg/ml  | 58%         | 85%         | 3.5 | 0.787<br>(0.61-0.96) | 102 pg/ml  | 67%         | 87%         | 5.0 |
| <b>S100A8/A9</b> | 0.757<br>(0.60-0.91) | 3205 ng/ml | 70%         | 80%         | 3.5 | 0.849<br>(0.69-0.99) | 3475 ng/ml | 73%         | 87%         | 5.5 |

CI, confidence interval; AUC, area under curve; LR, likelihood ratio
